# The PBAP remodeling complex is required for histone H3.3 replacement at chromatin boundaries and for boundary functions

Takahiro Nakayama\*, Tsukasa Shimojima\*<sup>‡</sup> and Susumu Hirose<sup>§</sup>

## SUMMARY

Establishment and maintenance of epigenetic memories are essential for development. Replacement of canonical histone H3 by its variant H3.3 has been implicated in cellular memory. *Drosophila* sequence-specific DNA-binding protein GAGA factor and a chromatin factor FACT direct H3.3 replacement in conjunction with H3.3-specific chaperone HIRA at chromatin boundaries to counteract the spreading of silent chromatin. However, little is known about which ATP-driven chromatin remodeling factor is responsible for the H3.3 replacement at chromatin boundaries. Here, we report that GAGA factor associates with the Polybromo-associated Brm (PBAP) remodeling complex, which consists of many Trithorax group proteins, and recruits this complex to chromatin boundaries *d1* (which is downstream of *w*), the *Fab-7* DNase-hypersensitive site (HS) 1 of *Abd-B* and the *bx*d region of *Ubx*. *Trl*-encoding GAGA factor, *brm* and *polybromol/bap180* mutations compromise the H3.3 replacement and boundary functions in a synergistic manner. Furthermore, Polybromo is necessary for generation of the DNase HS at *d1*, and HIRA functions to restore the alteration. Taken together, we propose that FACT and PBAP complexes are recruited to chromatin boundaries in a GAGA factor-dependent manner, and are needed for H3.3 replacement to execute boundary functions. Our results provide new insight into the function of the *trithorax* group during development.

**KEY WORDS:** PBAP complex, Histone H3.3, Chromatin boundary, FACT, *trithorax* group, *Drosophila*

## INTRODUCTION

DNA is wrapped around a histone octamer to form the basic unit of chromatin structure. During embryogenesis, dynamic changes of chromatin structure and chromatin modification occur after fertilization; subsequently, the epigenetic information is inherited through many rounds of the cell cycle. Thus, chromatin is essential for the determination of cell identity. Two strategies are used to modulate a chromatin environment: the covalent modification of histone tails and energy-dependent chromatin remodeling. The acetylation, methylation or phosphorylation of histone tails can have profound effects on chromatin structure and transcription (Jenuwein and Allis, 2001). Chromatin remodeling reactions are catalyzed by large protein complexes that use the energy of ATP hydrolysis to alter the structure or positioning of nucleosomes (Becker and Hörz, 2002; Clapier and Cairns, 2009). In addition to these events, histone variants play important roles in modulating chromatin structure (Henikoff and Ahmad, 2005; Kamakaka and Biggins, 2005; Sarma and Reinberg, 2005).

One histone variant, H3.3, has been studied extensively. Although histone H3.3 differs by only four amino acids from canonical histone H3.1, they differ in their mechanisms of chromatin deposition. Histone H3.1 is assembled into chromatin during DNA replication, whereas deposition of histone H3.3 occurs throughout the cell cycle (Ahmad and Henikoff, 2002).

Furthermore, the chaperone complex for H3.1 contains CAF-1, p150, p60 and p48, whereas the complex for H3.3 contains HIRA (Tagami et al., 2004). Biochemical analysis revealed that H3.3 is associated with active histone modifications such as H3 Lys 4 methylation (McKittrick et al., 2004). Moreover, a nucleosome containing H3.3 exhibits instability (Jin and Felsenfeld, 2007). Therefore, histone H3.3 replacement can change pre-existing epigenetic states.

Chromatin boundaries are transcriptional regulatory elements that modulate interaction between enhancer and promoter, and protect gene expression from positive or negative effects of the adjacent chromatin (Bell et al., 2001; Maeda and Karch, 2007). Establishment and maintenance of chromatin boundaries play a crucial role in development. For example, the *Fab-7* boundary governs space-specific expression of *Abd-B* by ensuring the autonomous activities of the *iab-6* and *iab-7* cis-regulatory regions (Mihaly et al., 1997). Previously, we have shown that GAGA factor interacts with FACT, induces chromatin remodeling and directs H3.3 replacement through an interaction with HIRA at chromatin boundaries *d1* and *Fab-7* to counteract the spreading of silent chromatin (Shimojima et al., 2003; Nakayama et al., 2007). Furthermore, H3.3 replacement peaks at multiple boundaries in the *Bithorax* complex, including *Mcp*, *Fab-7* and *Fab-8* (Mito et al., 2007). Thus, histone H3.3 replacement can influence chromatin boundary functions.

Although FACT displaces a histone H2A-H2B pair from a nucleosome (Belotserkovskaya et al., 2003), it alone cannot accomplish the H3.3 replacement that accompanies extensive chromatin remodeling, as revealed by DNase hypersensitivity (Nakayama et al., 2007). Furthermore, chromatin remodeling factors Chd1 and ATRX contribute to H3.3 deposition on the male pronucleus after fertilization and on pericentric or telomeric chromatin, respectively (Konev et al., 2007; Drané et al., 2010;

Department of Developmental Genetics, National Institute of Genetics, Mishima, Shizuoka-ken 411-8540, Japan.

\*These authors contributed equally to this work

<sup>‡</sup>Present address: Kazusa DNA Research Institute, 2-6-7 Kazusa-kamatari, Kisarazu, Chiba 292-0818, Japan

<sup>§</sup>Author for correspondence (shirose@nig.ac.jp)

Goldberg et al., 2010). Therefore, we assume that an ATP-dependent chromatin remodeling factor is necessary for the replacement at chromatin boundaries. Among the ATP-driven remodelers, a Swi/Snf-type complex is thought to be most suitable for the replacement because it has a unique activity to transfer a histone octamer from one piece of DNA to another (Lorch et al., 1999; Workman, 2006). There are two subclasses of the Swi/Snf-type complex that consist of many Trithorax group proteins in *Drosophila* (Mohrmann et al., 2004). One is the Brm-associated proteins (BAP) complex, which contains Osa in addition to core subunits that are shared by the two complexes: Brm, Mor/Bap155, Bap111, Bap60, Bap55, Actin, and Snr1. The other is PBAP complex, which harbors Polybromo/Bap180 and Bap170 in place of Osa. These two complexes correspond to mammalian Brg1- or Brm-associated factors (BAF), and Polybromo-associated BAF (PBAF) complexes, respectively. However, involvement of these complexes in H3.3 replacement is not clear in either *Drosophila* or mammals.

In this study, we isolated GAGA factor-associated proteins to identify an ATP-dependent chromatin remodeling factor responsible for the H3.3 replacement at chromatin boundaries. We found association of the GAGA factor with PBAP complex and GAGA factor-dependent recruitment of the PBAP complex to chromatin boundary regions. Furthermore, our data indicate that PBAP complex is required for the H3.3 replacement at chromatin boundaries and for boundary functions.

## MATERIALS AND METHODS

### Antibodies

For generation of antibodies against Brm, Polybromo or Bap60, we amplified cDNA encoding a polypeptide corresponding to residues 1 to 500 of Polybromo, residues 1301 to 1630 of Brm, or full length Bap60, followed by subcloning it into the pET21 expression vector. Recombinant proteins were expressed in *Escherichia coli* BL21 (DE3) pLysS at 25°C for 3 hours and were purified with Ni-NTA (Qiagen), followed by immunization of rabbits. Mouse anti-*Drosophila* Osa monoclonal antibody (Concentrate) was purchased from Developmental Studies Hybridoma Bank (DSHB, Iowa University, IA, USA). The purified anti-HIRA antibodies PG (Bonney et al., 2007) were a gift from B. Loppin (Universite Lyon, Lyon, France). The anti-SSRP1, SPT16 and GAGA factor antibodies have been described previously (Shimajima et al., 2003; Nakayama et al., 2007).

### Isolation of FLAG-GAGA factor associated proteins

All procedures were performed at 4°C. *Drosophila* embryos (125 g, 0-24 hours after egg laying) were collected from the fly line expressing FLAG-GAGA factor and dechorionated. Nuclear extract (NE, 100 mg protein) was prepared from the embryos, and FLAG-GAGA factor and its associated proteins were purified using 10 ml settled volume of FLAG M2 beads (Sigma-Aldrich) as described previously (Shimajima et al., 2003). To identify FLAG-GAGA factor-associated proteins, the eluted proteins were resolved by SDS-PAGE and transferred to a PVDF membrane (Roche Diagnostics) by a Trans-Blot Semi-Dry Apparatus (Bio-Rad, CA, USA). The membrane was subsequently stained with Coomassie Brilliant Blue, and protein in each band was subjected to MALDI-TOF mass analysis after digestion with lysylendopeptidase. For Superose 6 gel filtration, the pooled eluate was concentrated up to 500 µl with Amicon Ultra-15 (MWCO1000, Millipore). The concentrated proteins were loaded on a column of Superose 6 10/32 (GE Healthcare) and eluted with buffer F [20 mM HEPES Na<sup>+</sup> (pH 7.9), 50 mM NaCl, 0.2 mM EGTA, 10% (v/v) glycerol, 0.5 mM DTT, 0.01% (v/v) NP-40 and 0.5 mM PMSF]. Each 500 µl fraction was collected and proteins in each fraction were analyzed by western blotting.

### Immunoprecipitation

NE containing 500 µg proteins from 0- to 24-hour-old *Drosophila* embryos of the *yw* line, the transgenic line expressing HIRA-FLAG or third instar

larvae homozygous for *bap180Δ86* was pre-cleared by a 60-minute rotation with 10 µl of pre-immune rabbit IgG pre-adsorbed to 25 µl settled volume of Protein G agarose (Millipore) followed by centrifugation at 10,000 rpm (8000 g) for 5 minutes. The pre-cleared NE was incubated with 10 µl of rabbit antibodies against GAGA factor, Polybromo, Brm, SSRP1, SPT16, HIRA or anti-mouse monoclonal antibody against Osa or FLAG M2 pre-adsorbed to 25-µl settled volume of Protein G agarose in 500 µl of a binding buffer [20 mM HEPES Na<sup>+</sup> (pH 7.9), 50 mM (Fig. 1A,B) or 150 mM NaCl (Fig. 1C,D), 3 mM MgCl<sub>2</sub>, 10% (v/v) glycerol, 0.2 mM EDTA, 1/1000 volume of Protease inhibitor cocktail, 500 µg/ml BSA, 0.5 mM DTT, and 0.1% (v/v) NP-40] for 2 hours. The beads were washed five times with a wash buffer [the binding buffer + 0.4% (v/v) NP-40] by rotating tubes slowly for 5 minutes. Twenty-five µl of 2×SDS sample buffer was added to the beads and eluted proteins were heat-denatured at 95°C for 5 minutes and then were centrifuged at 3000 rpm (700 g) for 5 minutes. Proteins in the supernatant were loaded on a 6.5% SDS polyacrylamide gel. Whenever positive results were obtained by co-immunoprecipitation, we confirmed that the association was not mediated through nucleic acids by repeating the experiments in the presence of ethidium bromide.

### Western blotting

Proteins were resolved on a 6.5% or 8% SDS polyacrylamide gel and were transferred to a PVDF membrane (Millipore) in a transfer buffer [48 mM Tris base, 390 mM glycine, 20% (v/v) methanol, 0.1% SDS] for 180 minutes at 35 V. The membrane was blocked with 5% skim milk in TBST [20 mM Tris-HCl (pH 8.0), 150 mM NaCl and 0.1% (v/v) Tween 20] for 30 minutes at room temperature. The membrane was incubated with each primary antibody (1:2000) in 1% skim milk in TBST for 1-2 hours at room temperature or at 4°C overnight. The membrane was washed three times with TBST for 5 minutes at room temperature. The membrane was incubated with horseradish peroxidase (HRP)-conjugated secondary antibody (1:5000) in 1% skim milk in TBST for 1 hour at room temperature. Signals were detected with Supersignal+ (Pierce) and a LAS-4000 Mini Imaging System (FUJIFILM, Tokyo, Japan).

### Chromatin immunoprecipitation (ChIP)

ChIP assays using larval nuclei were performed as follows. Approximately 3500 third instar larvae homozygous for *Trl<sup>13C</sup>* were collected and stored at -80°C. The frozen larvae were thawed and homogenized in 5 ml of the buffer A [10 mM HEPES Na<sup>+</sup> (pH 7.9), 10 mM KCl, 3 mM MgCl<sub>2</sub>, 0.2 mM EGTA, 1 M sucrose, 0.5 mM DTT, 0.1% (v/v) NP-40, 0.5 mM PMSF and 1/1000 volume of Protease inhibitor cocktail (Sigma-Aldrich, P8340)]. The homogenate was filtered through two layers of 63-µm nylon mesh and was centrifuged at 1400 rpm (180 g) for 90 seconds to remove debris. The supernatant was centrifuged at 6000 rpm (3200 g) for 10 minutes. The pelleted nuclei were suspended with 5 ml of buffer G [20 mM HEPES Na<sup>+</sup> (pH 7.9), 10 mM KCl, 0.2 mM EGTA, 10% (v/v) glycerol, 0.5 mM DTT, 0.1% (v/v) NP-40, 0.5 mM PMSF and 1/1000 volume of Protease inhibitor cocktail]. The suspended nuclei were transferred into a 15-ml tube and equal volume of buffer H [20 mM HEPES Na<sup>+</sup> (pH 7.9), 10 mM KCl, 0.2 mM EGTA, 10% (v/v) glycerol, 0.1% (v/v) NP-40, 0.5 mM PMSF, 1/1000 volume of Protease inhibitor cocktail and 2% formaldehyde] was added. Crosslinking was carried out by rotating the tube for 15 minutes at 4°C. To stop the crosslink, one-ninth the volume of 1.25 M glycine was added and the tube was rotated for another 5 minutes. The tube was centrifuged at 3500 rpm (1600 g) for 10 minutes. Sonicated chromatin was prepared from the pelleted nuclei and subjected to ChIP as described previously (Nakayama et al., 2007). After phenol/chloroform extraction followed by ethanol precipitation, the DNA was dissolved in 100 µl of TE. Quantitative (q) PCR using 2-10 µl of the DNA was performed with a Light Cycler 2.0 (Roche Diagnostics, Mannheim, Germany). The experiments were repeated at least three times. For ChIP assays of *Trl<sup>+</sup>* (wild type) or *polybromo* mutant samples, ~800 third instar larvae of wild type or *bap180Δ86* (Carrera et al., 2008) homozygote were collected and processed as above. ChIP assays using embryos were carried out as described previously (Nakayama et al., 2007), except that amounts of DNA were quantified with qPCR as above.

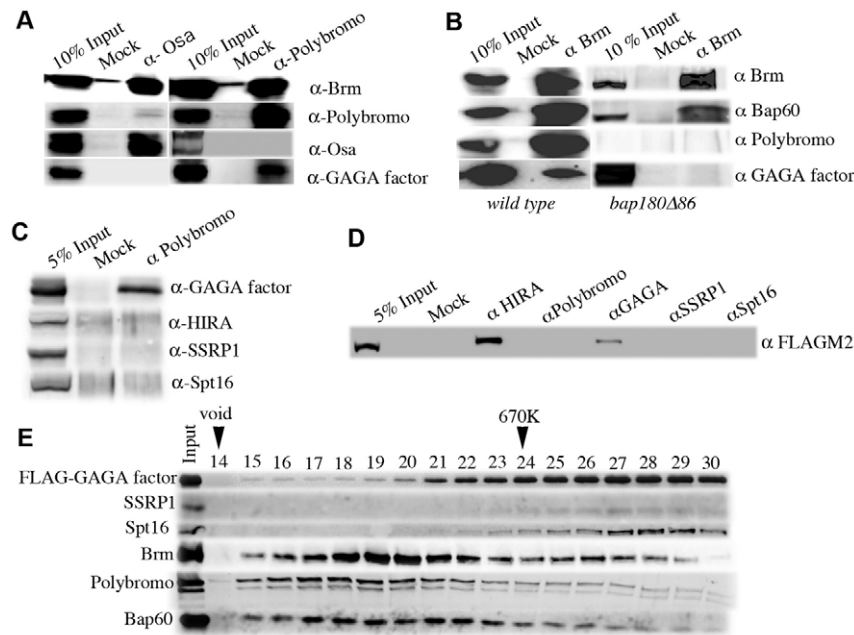

**Fig. 1. PBAP complex is associated with GAGA factor.** (A) Co-immunoprecipitation analyses using nuclear extracts (NEs) from *yw* embryos with anti-Osa antibody (left panel) or with anti-Polybromo antibodies (right panel). Eluted proteins were immunoblotted with antibodies against Brm, Polybromo, Osa or GAGA factor. (B) Co-immunoprecipitation analyses using NEs from *yw* embryos (left panel) or *bap180Δ86* homozygous larvae (right panel) with anti-Brm antibodies. Eluted proteins were immunoblotted with antibodies against Brm, Bap60, Polybromo or GAGA factor. (C) Co-immunoprecipitation analyses using NE from *yw* embryos with anti-Polybromo antibodies. Eluted proteins were immunoblotted with antibodies against GAGA factor, HIRA, SSRP1 or Spt16. (D) Co-immunoprecipitation analyses of HIRA-FLAG. Proteins in NEs from a fly line expressing HIRA-FLAG were immunoprecipitated with antibodies against HIRA, Polybromo, GAGA factor, SSRP1 or Spt16, and analyzed by immunoblotting using anti-FLAG antibody M2. (E) Gel filtration profile. Immunoaffinity-purified FLAG-GAGA factor-associated proteins were fractionated by Superose 6 gel filtration and proteins in each fraction were analyzed by immunoblots using antibodies against FLAG, FACT subunits, Brm, Polybromo or Bap60.

### Reverse transcription (RT)-qPCR

Total RNAs were prepared from third instar larvae using Sepasol (Nakalai Tesque). cDNAs were synthesized using a Transcriptor First Strand cDNA Synthesis Kit (Roche Diagnostics) in a 20  $\mu$ l-reaction mixture according to the manufacturer's protocol. Subsequently, 20  $\mu$ l of sterilized water were added to the reaction mixtures. The real-time qPCR were conducted using the Light Cycler 2.0 (Roche Diagnostics, Mannheim, Germany). Reactions were carried out using each 2  $\mu$ l of the cDNA as a template in a 20- $\mu$ l reaction mixture. The amount of starting cDNA was normalized to that of  $\beta$ -tubulin. The experiments were repeated at least three times. Primer sequences used for qPCR are shown in supplementary material Table S1.

### Position effect variegation

For position effect variegation (PEV) assays, *w<sup>m4</sup>* or *w<sup>m4</sup>; Trl<sup>R85</sup>/TM6B* females were crossed with wild-type or a mutant males, and male progenies with a desired genotype were used for quantification of eye pigment levels. Twenty adult male flies eclosed within 24 hours were collected and processed as described previously (Nakayama et al., 2007). More than eight independent samples were measured.

### Abdominal segment (A) 6 to A5 transformation

*yw*, *yw; Trl<sup>R85</sup>/TM6B* or *yw; Aspt16/TM3* females were crossed with wild-type or a mutant males, and male progenies with a desired genotype were used for detection of ectopic bristles on A6.

### Spel accessibility assay

The assays were carried out as described (Jack and Eggert, 1990). Nuclei were isolated from third instar larvae and  $\sim$ 5  $\mu$ g DNA was treated with 10 units of *Spel* (Takara, Kyoto) at 37°C for 30 minutes. Ten independent incubations were made for each line.

### Transgenic lines and other fly lines

Full-length Polybromo cDNA was obtained from National Institute of Genetics. The cDNA was subcloned into pET21 and a FLAG-encoding

sequence was introduced to the N-terminal region. The full-length cDNA of FLAG-Polybromo was digested with *MluI* and *NotI*, and inserted into a germline transform vector pCasperHS83\_EGFP (Nakayama et al., 2007). Transgenic flies were generated by *Drosophila* Embryo Injection Services (Best Gene). We used a line termed *yw; P[bap180<sup>+</sup>]*, in which the transgene was inserted into the second chromosome. We also established fly lines such as *P[hsp83-H3.3-FLAG,EGFP]; bap180Δ86/TM3*, *P[hsp83-H3.3-FLAG,EGFP]; bap180Δ86/TM3*, *P[hsp83-H3.3-FLAG,EGFP]; brm<sup>2</sup>/TM3*, *P[hsp83-H3.3-FLAG,EGFP]; brm<sup>2</sup>/TM3*, *P[hsp83-H3.3-FLAG,EGFP]; Trl<sup>13C</sup>/bap180Δ86*, *P[hsp83-H3.3-FLAG,EGFP]; Trl<sup>13C</sup>/bap180Δ86*, *P[hsp83-H3.3-FLAG,EGFP]; Trl<sup>13C</sup>/brm<sup>2</sup>*, *P[hsp83-H3.3-FLAG,EGFP]; Trl<sup>13C</sup>/brm<sup>2</sup>, w<sup>m4</sup>; Trl<sup>R85</sup>/TM6B*, *P[bap180<sup>+</sup>]; bap180Δ86*, *P[hsp83-H3.3-FLAG,EGFP]; osa<sup>2</sup>/TM3*, *P[hsp83-H3.3-FLAG,EGFP]; osa<sup>2</sup>/TM3*, *ssm/FM7; P[hsp83-H3.3-FLAG,EGFP]*, *ssm/FM7; P[hsp83-H3.3-FLAG,EGFP]*, *ssm/FM7GFP* and *ssm/FM7GFP; bap180Δ86/TM6B* through appropriate crosses. *bap180Δ86/TM6B* and *Trl<sup>R85</sup>/TM6B* were gifts from Drs J. Treisman (New York University School of Medicine, NY, USA) and C. Wu (National Institutes of Health, MD, USA), respectively. *brm<sup>2</sup>/TM6B* and *osa<sup>2</sup>/TM6B* were obtained from the Bloomington Stock Center (Indiana University, IN, USA). Other fly lines have been described previously (Shimajima et al., 2003; Nakayama et al., 2007).

## RESULTS

### Isolation of GAGA factor-associated proteins

GAGA factor induces chromatin remodeling at chromatin boundaries (Nakayama et al., 2007) and, hence, we presumed that an ATP-dependent chromatin remodeler would be recruited to the boundaries through association with GAGA factor. When we isolated FLAG-GAGA factor-associated proteins in the previous study, the anti-FLAG immunoaffinity purification was conducted in the presence of 420 mM NaCl. Under this condition, only FACT

**Table 1. MALDI-TOF mass spectrometric analyses of GAGA factor-associated proteins**

| Symbol    | Locus tag | Accession number | Full length<br>(amino acids) | Total peptides | Mascot score | Total number of<br>amino acid residues | Coverage (%) |
|-----------|-----------|------------------|------------------------------|----------------|--------------|----------------------------------------|--------------|
| Nurf301   | CG8274    | AAL16644.1       | 2669                         | 25             | 122          | 298                                    | 13.1         |
| Kismet    | CG3696    | AAF51530.1       | 2151                         | 10             | 35           | 103                                    | 5.7          |
| dMi-2     | CG8103    | AAF49099.2       | 1982                         | 26             | 152          | 285                                    | 13.3         |
| Polybromo | CG11375   | AAF56339.1       | 1654                         | 48             | 290          | 670                                    | 41.0         |
| Tho2      | CG31671   | AAF51302.2       | 1641                         | 46             | 256          | 527                                    | 33.0         |
| Brm       | CG5942    | AAA19661         | 1638                         | 57             | 233          | 662                                    | 29.9         |
| Mor       | CG18740   | NP_524373.1      | 1209                         | 24             | 148          | 410                                    | 23.2         |
| Spt16     | CG1828    | NP_476610.2      | 1083                         | 27             | 161          | 332                                    | 24.7         |
| ISWI      | CG4119    | AAM11261.1       | 1027                         | 12             | 84           | 120                                    | 11.6         |
| SSRP1     | CG4817    | AAF47064.1       | 723                          | 19             | 84           | 191                                    | 26.6         |
| Rpd3      | CG7471    | AAF47924.1       | 521                          | 7              | 64           | 98                                     | 22.5         |
| Bap60     | CG4303    | AAF48235.1       | 515                          | 13             | 123          | 137                                    | 24.3         |
| Bap55     | CG6546    | NP_611209.1      | 425                          | 13             | 165          | 184                                    | 39.3         |
| Thoc6     | CG5632    | XM_003804691.1   | 350                          | 6              | 93           | 62                                     | 17.7         |
| Actin     | CG4027    | AAF46098.1       | 376                          | 7              | 108          | 96                                     | 25.5         |
| Snr1      | CG1064    | AAC77830.1       | 370                          | 5              | 77           | 69                                     | 18.6         |

was co-eluted with FLAG-GAGA factor (Shimajima et al., 2003). In the present study, we decreased the concentration of NaCl to 50 mM throughout sample application, washing and elution to isolate proteins that are weakly associated with GAGA factor. MALDI-TOF mass spectrometric analyses revealed that FLAG-GAGA factor was co-eluted with numerous proteins, such as Mi-2, Brm and Kismet, and the previously described GAGA factor-associated proteins Nurf 301, ISWI (Xiao et al., 2001) and FACT (Shimajima et al., 2003) (Table 1). Interestingly, the GAGA factor-associated proteins also included multiple core subunits of Brm complex, such as Mor, Bap60, Bap55, Snr1 and Actin, in addition to Brm. Therefore, we focused here on the Brm complex as a candidate ATP-dependent remodeler that is responsible for H3.3 replacement at chromatin boundaries.

MALDI-TOF mass spectrometry showed that GAGA factor was co-eluted with Polybromo but not with Osa (Table 1), suggesting that GAGA factor associates with the PBAP complex but not with the BAP complex. To confirm this, we performed co-immunoprecipitation with antibodies against Polybromo or Osa, followed by immunoblotting with antibodies against GAGA factor, Brm, Polybromo or Osa. We found that GAGA factor and Brm but not Osa were co-precipitated with Polybromo when nuclear extract (NE) from *yw* embryos was immunoprecipitated with anti-Polybromo antibodies (Fig. 1A, right panel). By contrast, neither GAGA factor nor Polybromo was co-precipitated with Osa when we used anti-Osa antibody (Fig. 1A, left panel). Reciprocal immunoprecipitation showed that Bap60, Polybromo and GAGA factor were co-precipitated with anti-Brm antibodies (Fig. 1B, left panel). Taken together, these data demonstrate that GAGA factor associates with the PBAP complex.

We then carried out the same set of immunoprecipitation with anti-Brm antibodies as above using NE from larvae homozygous for a *polybromo* mutation *bap180Δ86*. Polybromo protein was not detectable in both input and immunoprecipitated lanes (Fig. 1B, right panel), confirming that the allele is protein null (Carrera et al., 2008). Although co-immunoprecipitation of Bap60 with Brm suggests the presence of the Brm complex, GAGA factor was not co-precipitated with Brm. These results indicate that Polybromo is necessary for the association of GAGA factor with the PBAP complex.

Previously, we have shown that GAGA factor is associated with FACT (Shimajima et al., 2003) and HIRA (Nakayama et al., 2007). To examine the relationship among GAGA factor, FACT, HIRA

and PBAP, we extended the co-immunoprecipitation experiments. When proteins in NE from *yw* embryos were immunoprecipitated with anti-Polybromo antibodies, FACT components SSRP1 and Spt16, and HIRA were not co-precipitated (Fig. 1C). Furthermore, using NE from embryos of the transgenic line expressing HIRA-FLAG (Loppin et al., 2005), we observed that HIRA-FLAG was co-precipitated with GAGA factor as reported previously (Nakayama et al., 2007), but not with Polybromo, SSRP1 and Spt16 (Fig. 1D). From these results, although GAGA factor is associated with FACT, PBAP and HIRA, it is most likely that GAGA factor-FACT, GAGA factor-PBAP and GAGA factor-HIRA are distinct complexes.

### Identification of GAGA factor-PBAP complex

To further confirm association of GAGA factor with PBAP complex, we analyzed the affinity-purified FLAG-GAGA factor-associated proteins by gel filtration through Superose 6 (Fig. 1E). The eluted fractions were resolved by SDS-PAGE and immunoblots were probed with antibodies against Brm, Polybromo, Bap60, SSRP1, Spt16 or FLAG. Components of PBAP, i.e. Brm, Polybromo and Bap60, were co-eluted mainly in fraction numbers 17-21. This represents the PBAP complex with a molecular mass of ~2 MDa (Mohrmann et al., 2004). A small but significant proportion of FLAG-GAGA factor was co-eluted with the PBAP complex. By contrast, the profile of FACT (SSRP1 and Spt16) did not overlap with the peak of the PBAP complex. Rather, FACT was co-eluted with the majority of FLAG-GAGA factor in fraction numbers 27-29, which correspond to the molecular mass of the FLAG-GAGA factor-FACT complex. These data indicate that GAGA factor forms a complex with PBAP remodeler and support the notion that the GAGA factor-PBAP complex and the GAGA factor-FACT complex are distinct from each other.

### GAGA factor recruits PBAP complex and HIRA to chromatin boundaries

If PBAP complex functions at chromatin boundaries, it should be detected at boundaries. To examine occupancy of PBAP complex at chromatin boundaries, we carried out ChIP assays using chromatin fragments prepared from third instar larvae of wild type. GAGA factor, a FACT subunit SSRP1 and subunits of PBAP (Polybromo, Brm and Bap60) but not Osa were detected at three

chromatin boundaries: *d1*, *Fab-7* HS1 and the *bxd* region (Fig. 2A,B, wild type). These results indicate that GAGA factor, the PBAP complex and FACT are present at the chromatin boundaries. We also analyzed occupancies of HIRA at the chromatin boundaries. Confirming our previous study (Nakayama et al., 2007), HIRA was detected at *d1* (Fig. 2B). We also found occupancies of HIRA at *Fab-7* and *bxd* (Fig. 2B).

GAGA factor is expected to recruit these complexes to the chromatin boundaries, as all these boundaries carry a cluster of GAGA factor-binding sites. To test the possibility, we searched for a GAGA factor-deficient condition. RNAi-mediated knockdown of GAGA factor was not efficient because of the self-regulation of *Trl*-encoding GAGA factor (Bernués et al., 2007). Therefore, we employed a hypomorphic allele, *Trl<sup>13C</sup>*, in which a P-element is inserted into the first intron of *Trl* (Farkas et al., 1994). Although bulk of *Trl<sup>13C</sup>* homozygotes died during embryogenesis, rare escapers grew until third instar larvae. We raised the *Trl<sup>13C</sup>/TM6B* line in thousands of vials and collected the escapers without the *Tb* phenotype of *TM6B* for ChIP assays. We found that the levels of occupancy of GAGA factor at the three boundaries were markedly reduced in *Trl<sup>13C</sup>* compared with those in wild type (Fig. 2A, *Trl<sup>13C</sup>*). The levels of SSRP1, Polybromo, Brm, Bap60 and HIRA at the boundaries were also severely reduced in a similar manner to that of GAGA factor (Fig. 2A,B, *Trl<sup>13C</sup>*). This is not due to reduction in the expression levels of SSRP1, Polybromo, Brm, Bap60 and HIRA in *Trl<sup>13C</sup>*, as RT-qPCR showed that the expression levels of SSRP1, Polybromo, Brm, Bap60 and HIRA mRNAs were not affected in *Trl<sup>13C</sup>* (Fig. 2C). Taken together, these data demonstrate GAGA factor-dependent recruitment of FACT, PBAP complex and HIRA to the chromatin boundaries.

Conversely, it is possible that the PBAP remodeler could facilitate the recruitment of GAGA factor, FACT and HIRA to the boundaries. To test the possibility, we collected third instar larvae that are homozygous for the *polybromo* mutation *bap180Δ86* and carried out ChIP assays. As shown in Fig. 2A,B, the occupancies of GAGA factor, FACT and HIRA were barely affected by the *polybromo* mutation, although the levels of Polybromo, Brm and Bap60 were severely reduced in the mutant. These results suggest that PBAP remodeler is not required for the recruitment of GAGA factor, FACT or HIRA to the boundaries.

### PBAP complex and HIRA function in H3.3 replacement at chromatin boundaries

We next investigated whether PBAP complex and HIRA are involved in the H3.3 replacement at chromatin boundaries. To this end, we first established a fly line expressing histone H3.3-FLAG or H3-FLAG, which is heterozygous for *brm<sup>2</sup>*, *bap180Δ86*, *osa<sup>2</sup>* or *hira* mutation *ssm* (Loppin et al., 2005), or trans-heterozygous for *Trl<sup>13C</sup>* and *brm<sup>2</sup>*, or for *Trl<sup>13C</sup>* and *bap180Δ86*. The expression level of the H3.3-FLAG or H3-FLAG was ~1% the level of endogenous histone H3 (Nakayama et al., 2007). The low expression level would not disturb fly physiology but allow us to use the FLAG-tagged histone as a tracer. We then collected embryos 10–22 hours after egg laying and performed ChIP assays using a FLAG M2 monoclonal antibody. The heterozygous population consisted of embryos heterozygous for the mutation (50%), homozygous for the mutation (25%) and homozygous for a balancer or for the other mutation in the case of trans-heterozygote (25%), but we call the population simply heterozygote or trans-heterozygote here. We found that the ratio of H3.3 to H3 in *Trl<sup>13C</sup>*, *bap180Δ86*, *brm<sup>2</sup>* or *ssm* heterozygote was significantly reduced at *d1*, *Fab-7* HS1 and *bxd* regions compared

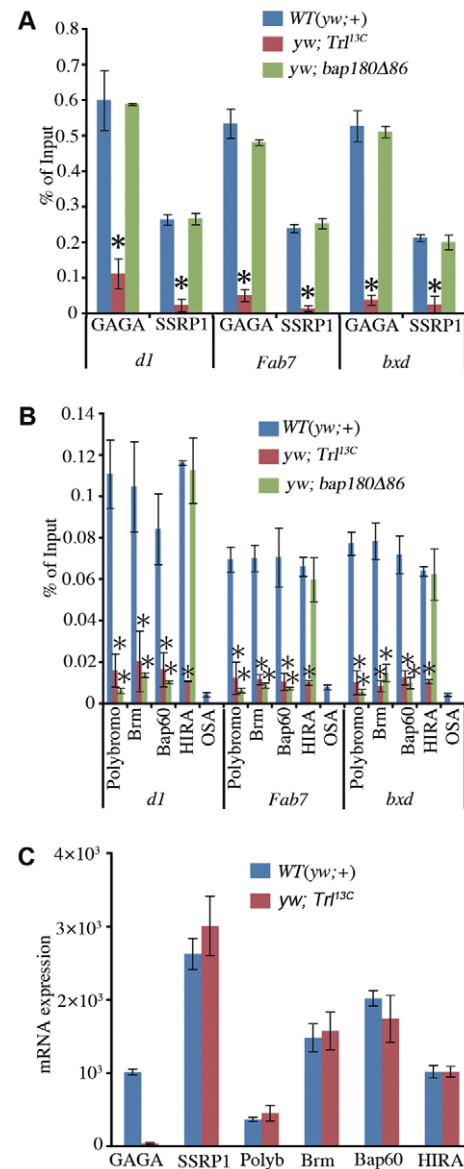

**Fig. 2. GAGA factor recruits PBAP complex and HIRA to chromatin boundaries.** (A,B) Occupancies of GAGA factor, FACT, PBAP complex and HIRA at chromatin boundaries *d1*, *Fab-7* HS1 and *bxd*. ChIP assays were carried out with antibodies against GAGA factor, SSRP1, Polybromo, Brm, Bap60, HIRA and Osa using larval nuclei from wild type, *Trl<sup>13C</sup>* or *bap180Δ86*. (C) Expression levels of GAGA factor, SSRP1, Polybromo, Brm, Bap60 and HIRA mRNAs in wild-type or *Trl<sup>13C</sup>* larvae. Data were normalized to  $\beta$ -tubulin mRNA. Experiments were repeated three times. Error bars represent s.d. Asterisks indicate statistical significance according to Welch's *t*-test: \**P*<0.005.

with wild type (Fig. 3). Moreover the ratio of H3.3 to H3 was further reduced in *Trl<sup>13C</sup>/brm<sup>2</sup>* or *Trl<sup>13C</sup>/bap180Δ86* trans-heterozygote compared with *Trl<sup>13C</sup>*, *brm<sup>2</sup>* or *bap180Δ86* single heterozygote. As a negative control, *osa<sup>2</sup>* heterozygote did not affect the H3.3/H3 ratio at the boundaries. Furthermore, at control sites such as *iab-6* and *d6*, the H3.3/H3 ratios in the mutants were almost the same as that in wild type. These data indicate that PBAP complex and HIRA are required for the H3.3 replacement at the chromatin boundaries.

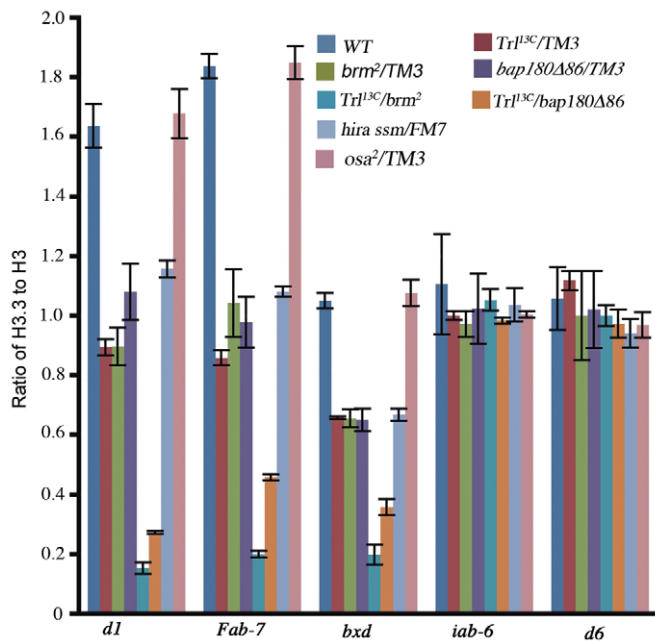

**Fig. 3. PBAP complex and HIRA are required for H3.3 replacement at chromatin boundaries.** ChIP assays were carried out with the anti-FLAG M2 antibody using embryos from wild type or from each mutant line harboring either *P[EGFP, hsp83-H3.3-FLAG]* or *P[EGFP, hsp83-H3-FLAG]* transgene. Shown is the ratio of H3.3 to H3 in each line. The experiments were repeated at least four times. Data are mean $\pm$ s.d. Differences between wild type and each heterozygote (except *osa*<sup>2</sup> heterozygote) or between *Trl*<sup>13C</sup> heterozygote and each trans-heterozygote are significant ( $P < 0.001$ ; Welch's *t*-test).

### Polybromo is responsible for alteration of chromatin structure and HIRA functions to restore this alteration

Dynamic histone H3.3 replacement at a chromatin boundary would generate a DNase HS. Indeed, we have shown that GAGA factor directs formation of a DNase HS at the *d1* boundary (Nakayama et al., 2007). To test whether PBAP complex is involved in the alteration of chromatin structure, we carried out *SpeI* accessibility assays. The assay relies on inhibition of qPCR encompassing an *SpeI* site upon *SpeI*-mediated cleavage of DNA (Fig. 4, naked DNA). When nuclei isolated from wild-type larvae were treated with *SpeI*, the qPCR levels at *d1* was ~50% of undigested control, whereas the level at a control *SpeI* site was ~90% of undigested control (Fig. 4). These results confirm our previous conclusion that *d1* is a DNase HS. By contrast, the *SpeI* accessibility at *d1* was severely compromised in nuclei from *bap180Δ86* homozygous larvae. Expressing Polybromo/Bap180 from a transgene restored the accessibility in *bap180Δ86*. These results demonstrate that Polybromo is responsible for the formation of DNase HS at *d1*.

As HIRA is another key player in the H3.3 replacement, we also analyzed the *SpeI* accessibility in nuclei from *hira ssm* larvae. Interestingly, the accessibility at *d1* in *ssm* larvae was even higher than that in wild type, while the control *SpeI* site was barely accessible. These results suggest that the *SpeI* accessibility at *d1* in wild type is under equilibrium between Polybromo-dependent enhancement and HIRA-dependent reduction. Furthermore, this *ssm* phenotype was suppressed by the homozygous *bap180Δ86* allele: the accessibility in *ssm; bap180Δ86* double mutant was

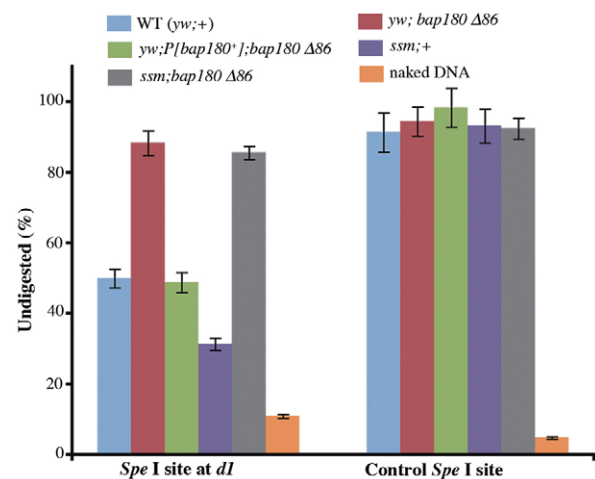

**Fig. 4. *SpeI* accessibility assays.** The assays were carried out in wild type and indicated mutants with qPCR levels relative to undigested control (%). A *SpeI* recognition sequence is present immediately before (GA)<sub>8</sub> at *d1*. A control *SpeI* site was chosen arbitrarily ~11 kb downstream of *d1*. The *SpeI* incubations were repeated ten times in each line. Data are mean $\pm$ s.d. Differences between wild type and *bap180Δ86* or *ssm* are significant ( $P < 0.001$ ; Welch's *t*-test).

almost the same level as that in the *bap180Δ86* single mutant. These data suggest that HIRA restores the Polybromo-induced alteration of chromatin structure and that this HIRA activity is dependent on the Polybromo function.

### Crucial role of PBAP complex in boundary functions

In the *w<sup>m4</sup>* line, where *w* is juxtaposed with pericentric heterochromatin, counteraction of the heterochromatin spread at the *d1* boundary maintains *w* expression (Nakayama et al., 2007). Therefore, the boundary function at *d1* can be assessed by position effect variegation (PEV). To test whether PBAP complex is involved in the boundary function at *d1*, we analyzed PEV in wild type and various mutants under the *w<sup>m4</sup>* background (Fig. 5). *Trl<sup>R85</sup>* is a deletion allele that is obtained by excision of the P-element in *Trl<sup>13C</sup>*. Its deletion removes extensive regions of the *Trl* transcription unit and, hence, it is presumed to be a null allele (Farkas et al., 1994). As reported previously (Farkas et al., 1994), PEV was enhanced (i.e. eye pigmentation was reduced) in *Trl<sup>R85</sup>/+*. *brm<sup>2</sup>/+* also enhanced PEV. Similarly, PEV was enhanced in *bap180Δ86/+* and the enhancement was restored by expressing Polybromo/Bap180 from the transgene. Moreover, in *Trl<sup>R85</sup>* and *brm<sup>2</sup>* or *Trl<sup>R85</sup>* and *bap180Δ86* trans-heterozygotes, PEV was enhanced more than in each single heterozygote. As a control, *osa<sup>2</sup>/+* did not affect PEV. These data indicate that the PBAP complex plays a crucial role in the boundary function at *d1* together with GAGA factor.

*Fab-7* is the boundary that insulates between *iab-6* and *iab-7* enhancers of *Abd-B* (Mihaly et al., 1997). Defects in the *Fab-7* boundary function results in a homeotic transformation of the male A6 to A5, as revealed by formation of extra bristles on male A6. Previously, we have shown that defects in *Trl* and *spt16* encoding a FACT subunit cause the A6 to A5 transformation and genetic interaction between *Trl* and *spt16* on the phenotype (Shimajima et al., 2003). To examine whether PBAP complex is involved in the

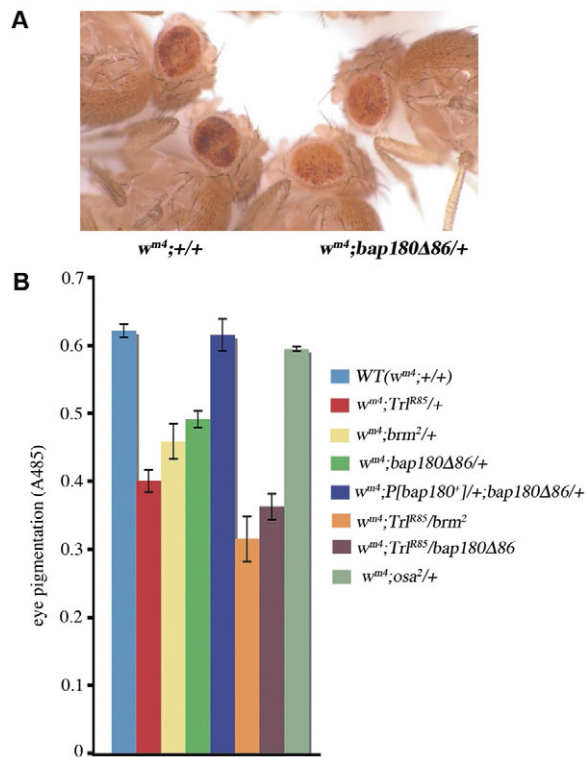

**Fig. 5. Importance of PBAP complex to counteract heterochromatin spreading at *d1* boundary.** (A) A typical example of position effect variegation (PEV), demonstrating enhancement in *bap180Δ86/+* (right two flies) compared with *+/+* (left two flies). (B) PEV assays were carried out by measuring eye pigmentation in male flies of indicated genotypes under the  $w^{m4}$  background. The experiments were repeated at least eight times. Data are mean $\pm$ s.d. Differences between wild type and each heterozygote, except *osa^2/+*, or between *Trl<sup>R85</sup>/+* and each trans-heterozygote are significant ( $P < 0.001$ ; Welch's *t*-test).

boundary function at *Fab-7*, we analyzed frequencies of the A6 to A5 transformation in wild type and various mutants (Table 2). We were unable to find the A6 to A5 transformation in wild type and *osa^2/+*. However, we observed the transformation in *Trl<sup>R85</sup>/+*, *brm^2/+* and *Δspt16/+*, although the frequency was low. A similar frequency of the transformation was detected in *bap180Δ86/+*, and this phenotype was rescued by expressing Polybromo/Bap180 from the transgene. In the *bap180Δ86* homozygote, we observed a marked increase in the frequency of this transformation compared with the *bap180Δ86* heterozygote and this phenotype was rescued by expressing Polybromo/Bap180 from two doses of the transgene. Moreover, in *Trl<sup>R85</sup>* and *brm^2*, *Trl<sup>R85</sup>* and *bap180Δ86* or *Δspt16* and *bap180Δ86* trans-heterozygotes, the frequency of this transformation was higher than in each single heterozygote. These data indicate that PBAP complex functions at the *Fab-7* boundary together with GAGA factor and FACT.

## DISCUSSION

In the previous study, we have shown that the GAGA factor-FACT complex directs the H3.3 replacement at chromatin boundaries in conjunction with the histone chaperone HIRA (Nakayama et al., 2007). The present study demonstrates that PBAP remodeling complex is recruited to the boundaries in a GAGA factor-dependent manner and contributes to the H3.3 replacement at the boundaries.

**Table 2. The PBAP complex is required for boundary function at *Fab-7***

| Genotype                           | A6 to A5 transformation/<br>total number | Percentage |
|------------------------------------|------------------------------------------|------------|
| Wild type                          | 0/504                                    | 0          |
| <i>Trl<sup>R85</sup>/+</i>         | 19/472                                   | 4          |
| <i>brm^2/+</i>                     | 18/452                                   | 4          |
| <i>bap180Δ86/+</i>                 | 27/706                                   | 4          |
| <i>P[bap180^+]/+;bap180Δ86/+</i>   | 0/807                                    | 0          |
| <i>bap180Δ86</i>                   | 104/260                                  | 40         |
| <i>P[bap180^+];bap180Δ86</i>       | 0/511                                    | 0          |
| <i>Δspt16/+</i>                    | 21/461                                   | 5          |
| <i>Trl<sup>R85</sup>/brm^2</i>     | 36/313                                   | 12         |
| <i>Trl<sup>R85</sup>/bap180Δ86</i> | 33/275                                   | 12         |
| <i>Δspt16/bap180Δ86</i>            | 45/305                                   | 15         |
| <i>osa^2/+</i>                     | 0/516                                    | 0          |

Frequencies of the A6 to A5 transformation were measured in males of indicated genotypes. Differences between wild type and each single heterozygote, except *osa^2/+*, or between *Trl<sup>R85</sup>/+* or *Δspt16/+* and each transheterozygote were significant ( $P < 0.001$ ; Fisher's exact test).

Our study also revealed that Polybromo is responsible for the generation of a DNase HS and that HIRA functions to restore the altered state. Taken together, we propose the following model for the H3.3 replacement at a chromatin boundary (Fig. 6). GAGA factor recruits FACT and PBAP to boundaries carrying multiple GAGA factor-binding sites. FACT displaces a H2A-H2B pair from a nucleosome with the displaced H2A-H2B being anchored by FACT. This facilitates access of PBAP to a H3-H4 tetramer because the tetramer is sandwiched between two H2A-H2B dimers in a nucleosome core. Then PBAP would displace H3-H4. The resulting nucleosome-free region would be a DNase HS and become a target of the HIRA-ASF1 chaperone complex (Tagami et al., 2004) for deposition of H3.3-H4, as proposed by Ray-Gallet et al. (Ray-Gallet et al., 2011). The deposition of H3.3-H4 would mask the DNase HS. Finally, FACT deposits the tethered H2A-H2B pair to reconstitute the nucleosome. The process would be repeated continuously to achieve boundary function. As FACT, Polybromo-containing Brm complex, HIRA and ASF1 are conserved among species from *Drosophila* to human, a similar mechanism may also operate in mammals.

What is the role of H3.3 replacement in boundary function? It has been reported that H3.3 is associated with active histone modifications such as Lys 4 methylation but tends to avoid Lys 9 methylation (McKittrick et al., 2004). Indeed, we have detected a peak of H3K4 methylation and a dip of H3K9 methylation at the *d1* boundary (Nakayama et al., 2007). Therefore, the continuous H3.3 replacement at chromatin boundaries can prevent the spreading of specific histone modifications. Alternatively, the intrinsic instability of a nucleosome containing H3.3 (Jin and Felsenfeld, 2007) and the transient disruption of nucleosome structure during H3.3 replacement would generate a nucleosome-free region. This nucleosome gap can serve as a barrier against the spreading of chromatin with specific epigenetic memories.

Before isolation of GAGA factor-associated proteins, we anticipated the presence of a huge complex containing GAGA factor, FACT and a chromatin remodeling factor. However, our data suggest the presence of two distinct complexes: the GAGA factor-FACT complex and the GAGA factor-PBAP complex. This means that at least two GAGA factor-binding sites, one for the GAGA factor-FACT complex and the other for the GAGA factor-PBAP complex, are necessary within a boundary to allow

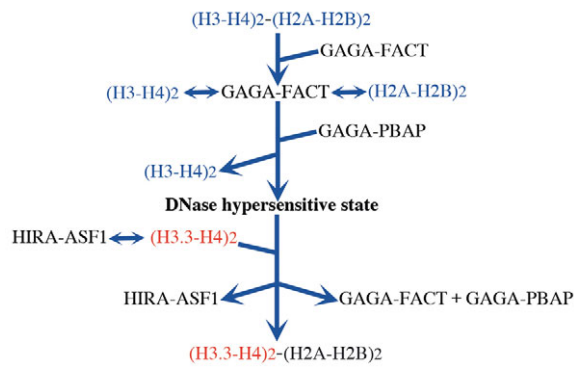

**Fig. 6. Model for H3.3 replacement at the chromatin boundary.**

GAGA factor recruits FACT and PBAP to a chromatin boundary harboring a cluster of GAGA factor-binding sites. FACT interacts with a nucleosome and displaces a H2A-H2B pair while anchoring the displaced pair. This would facilitate PBAP-mediated displacement of an H3-H4 tetramer. The histone-displaced region of DNA would be a DNase HS. Then HIRA-ASF1 complex would deposit H3.3-H4 on the region to restore from the DNase-hypersensitive state. Finally, FACT deposits the tethered H2A-H2B pair to reconstitute the nucleosome.

concerted actions of FACT and PBAP for the H3.3 replacement. This may preclude the H3.3 replacement to occur at a single GAGA factor-binding site that is present frequently within the genome. In good agreement with the idea, chromatin boundaries harbor a cluster of GAGA factor-binding sites that are occupied with the factors. For example, ChIP assays using anti-GAGA factor antibodies showed a prominent signal at *d1* consisting of (GA)<sub>8</sub> compared with other single GAGA factor-binding sites around *w* (Nakayama et al., 2007). The present study revealed that the level of GAGA factor at *Fab-7* HS1 or *bxid*, which harbor multiple closely spaced GAGA factor-binding sites, was comparable with that at *d1* (Fig. 2A,B, wild type). Because multiple GAGA factor-binding sites are present in other boundaries [such as *Fab-8* and *Mcp* in the *Bithorax* complex (Busturia et al., 2001; Moon et al., 2005), regulatory elements of the  $\alpha 1$ -tubulin gene (O'Donnell et al., 1994), and the SF1 insulator of the *Antennapedia* complex (Belozero et al., 2003)], the FACT- and PBAP-dependent H3.3 replacement may also occur at these boundaries. Multiple closely spaced GAGA factor-binding sites are presumably an indicator of the chromatin boundary.

The present study demonstrates that the PBAP complex but not the BAP complex is required for the boundary functions. These two subtypes of Swi/Snf remodeling factor possess overlapping, distinct and counteracting functions (Collins and Treisman, 2000; Moshkin et al., 2007; Carrera et al., 2008). As for the distinct functions, while the BAP complex controls the cell cycle and Wingless target genes (Collins and Treisman, 2000; Moshkin et al., 2007), the PBAP complex regulates metamorphosis and the immune response (Carrera et al., 2008). Whether the H3.3 replacement-mediated boundary function is involved in the regulation of metamorphosis or the immune response remains to be clarified in future studies.

Recent articles have reported involvement of ATP-dependent remodeling factors in deposition of H3.3 into chromatin. First, it has been shown that Chd1 is required for the deposition of H3.3 into decondensing sperm chromatin after fertilization (Konev et al., 2007). Others have demonstrated contribution of ATRX to the deposition of H3.3 at pericentric chromatin and telomeres (Drané et al., 2010; Goldberg et al., 2010). We show here that PBAP is

required for H3.3 replacement at the chromatin boundaries. These data support the idea that distinct ATP-dependent remodelers work for H3.3 deposition at specific locations within the genome (Goldberg et al., 2010). Interestingly, null mutations in *Drosophila polybromo/bap180*, *chd1* and *hira* exhibit the same phenotype, i.e. viable but female sterile (Bonney et al., 2007; Konev et al., 2007; Carrera et al., 2008), suggesting that the H3.3 deposition at the specific genomic locations is essential for early embryogenesis.

#### Acknowledgements

We thank Drs J. Treisman, B. Loppin and C. Wu, and the Bloomington Stock Center for providing us with fly lines and antibodies.

#### Funding

This work was supported by a Grant in Aid for Scientific Research from Ministry of Education, Culture, Sports, Science and Technology (MEXT), Japan. T.S. was supported by the Japanese Society for the Promotion of Science.

#### Competing interests statement

The authors declare no competing financial interests.

#### Supplementary material

Supplementary material available online at

<http://dev.biologists.org/lookup/suppl/doi:10.1242/dev.083246/-/DC1>

#### References

- Ahmad, K. and Henikoff, S. (2002). The histone variant H3.3 marks active chromatin by replication-independent nucleosome assembly. *Mol. Cell* **9**, 1191-1200.
- Becker, P. B. and Hörz, W. (2002). ATP-dependent nucleosome remodeling. *Annu. Rev. Biochem.* **71**, 247-273.
- Bell, A. C., West, A. G. and Felsenfeld, G. (2001). Insulators and boundaries: versatile regulatory elements in the eukaryotic genome. *Science* **291**, 447-450.
- Belotserkovskaya, R., Oh, S., Bondarenko, V. A., Orphanides, G., Studitsky, V. M. and Reinberg, D. (2003). FACT facilitates transcription-dependent nucleosome alteration. *Science* **301**, 1090-1093.
- Belozero, V. E., Majumder, P., Shen, P. and Cai, H. N. (2003). A novel boundary element may facilitate independent gene regulation in the *Antennapedia* complex of *Drosophila*. *EMBO J.* **22**, 3113-3121.
- Bernués, J., Piñeyro, D. and Kosoy, A. (2007). General, negative feedback mechanism for regulation of Trithorax-like gene expression in vivo: new roles for GAGA factor in flies. *Nucleic Acids Res.* **35**, 7150-7159.
- Bonnefoy, E., Orsi, G. A., Couble, P. and Loppin, B. (2007). The essential role of *Drosophila* HIRA for de novo assembly of paternal chromatin at fertilization. *PLoS Genet.* **3**, 1991-2006.
- Busturia, A., Lloyd, A., Bejarano, F., Zavortink, M., Xin, H. and Sakonju, S. (2001). The MCP silencer of the *Drosophila* Abd-B gene requires both Pleiohomeotic and GAGA factor for the maintenance of repression. *Development* **128**, 2163-2173.
- Carrera, I., Zavadil, J. and Treisman, J. E. (2008). Two subunits specific to the PBAP chromatin remodeling complex have distinct and redundant functions during *Drosophila* development. *Mol. Cell Biol.* **28**, 5238-5250.
- Clapier, C. R. and Cairns, B. R. (2009). The biology of chromatin remodeling complexes. *Annu. Rev. Biochem.* **78**, 273-304.
- Collins, R. T. and Treisman, J. E. (2000). Osa-containing Brahma chromatin remodeling complexes are required for the repression of wingless target genes. *Genes Dev.* **14**, 3140-3152.
- Drané, P., Ouararhni, K., Depaux, A., Shuaib, M. and Hamiche, A. (2010). The death-associated protein DAXX is a novel histone chaperone involved in the replication-independent deposition of H3.3. *Genes Dev.* **24**, 1253-1265.
- Farkas, G., Gausz, J., Galloni, M., Reuter, G., Gyurkovics, H. and Karch, F. (1994). The Trithorax-like gene encodes the *Drosophila* GAGA factor. *Nature* **371**, 806-808.
- Goldberg, A. D., Banaszynski, L. A., Noh, K.-M., Lewis, P. W., Elsaesser, S. J., Stadler, S. J., Dewell, S., Law, M., Guo, X., Li, X. et al. (2010). Distinct factors control histone variant H3.3 localization at specific genomic regions. *Cell* **140**, 678-691.
- Henikoff, S. and Ahmad, K. (2005). Assembly of variant histones into chromatin. *Annu. Rev. Cell Dev. Biol.* **21**, 133-153.
- Jack, R. S. and Eggert, H. (1990). Restriction enzymes have limited access to DNA sequences in *Drosophila* chromosomes. *EMBO J.* **9**, 2603-2609.
- Jenuwein, T. and Allis, C. D. (2001). Translating the histone code. *Science* **293**, 1074-1080.
- Jin, C. and Felsenfeld, G. (2007). Nucleosome stability mediated by histone variants H3.3 and H2A.Z. *Genes Dev.* **21**, 1519-1529.
- Kamakaka, R. T. and Biggins, S. (2005). Histone variants: deviants? *Genes Dev.* **19**, 295-316.



- Konev, A. Y., Tribus, M., Park, S. Y., Podhraski, V., Lim, C. Y., Emelyanov, A. V., Vershilova, E., Pirrotta, V., Kadonaga, J. T., Lusser, A. et al. (2007). CHD1 motor protein is required for deposition of histone variant H3.3 into chromatin in vivo. *Science* **317**, 1087-1090.
- Loppin, B., Bonnefoy, E., Anselme, C., Laurençon, A., Karr, T. L. and Couble, P. (2005). The histone H3.3 chaperone HIRA is essential for chromatin assembly in the male pronucleus. *Nature* **437**, 1386-1390.
- Lorch, Y., Zhang, M. and Kornberg, R. D. (1999). Histone octamer transfer by a chromatin-remodeling complex. *Cell* **96**, 389-392.
- Maeda, R. K. and Karch, F. (2007). Making connections: boundaries and insulators in *Drosophila*. *Curr. Opin. Genet. Dev.* **17**, 394-399.
- McKittrick, E., Gafken, P. R., Ahmad, K. and Henikoff, S. (2004). Histone H3.3 is enriched in covalent modifications associated with active chromatin. *Proc. Natl. Acad. Sci. USA* **101**, 1525-1530.
- Mihaly, J., Hogga, I., Gausz, J., Gyurkovics, H. and Karch, F. (1997). In situ dissection of the Fab-7 region of the bithorax complex into a chromatin domain boundary and a Polycomb-response element. *Development* **124**, 1809-1820.
- Mito, Y., Henikoff, J. G. and Henikoff, S. (2007). Histone replacement marks the boundaries of cis-regulatory domains. *Science* **315**, 1408-1411.
- Mohrmann, L., Langenberg, K., Krijgsveld, J., Kal, A. J., Heck, A. J. and Verrijzer, C. P. (2004). Differential targeting of two distinct SWI/SNF-related *Drosophila* chromatin-remodeling complexes. *Mol. Cell. Biol.* **24**, 3077-3088.
- Moon, H., Filippova, G., Loukinov, D., Pugacheva, E., Chen, Q., Smith, S. T., Munhall, A., Grewe, B., Bartkuhn, M., Arnold, R. et al. (2005). CTCF is conserved from *Drosophila* to humans and confers enhancer blocking of the Fab-8 insulator. *EMBO Rep.* **6**, 165-170.
- Moshkin, Y. M., Mohrmann, L., van Ijcken, W. F. and Verrijzer, C. P. (2007). Functional differentiation of SWI/SNF remodelers in transcription and cell cycle control. *Mol. Cell. Biol.* **27**, 651-661.
- Nakayama, T., Nishioka, K., Dong, Y. X., Shimojima, T. and Hirose, S. (2007). *Drosophila* GAGA factor directs histone H3.3 replacement that prevents the heterochromatin spreading. *Genes Dev.* **21**, 552-561.
- O'Donnell, K. H., Chen, C. T. and Wensink, P. C. (1994). Insulating DNA directs ubiquitous transcription of the *Drosophila melanogaster* alpha 1-tubulin gene. *Mol. Cell. Biol.* **14**, 6398-6408.
- Ray-Gallet, D., Woolfe, A., Vassias, I., Pellentz, C., Lacoste, N., Puri, A., Schultz, D. C., Pchelintsev, N. A., Adams, P. D., Jansen, L. E. T. et al. (2011). Dynamics of histone H3 deposition in vivo reveal a nucleosome gap-filling mechanism for H3.3 to maintain chromatin integrity. *Mol. Cell* **44**, 928-941.
- Sarma, K. and Reinberg, D. (2005). Histone variants meet their match. *Nat. Rev. Mol. Cell Biol.* **6**, 139-149.
- Shimojima, T., Okada, M., Nakayama, T., Ueda, H., Okawa, K., Iwamatsu, A., Handa, H. and Hirose, S. (2003). *Drosophila* FACT contributes to Hox gene expression through physical and functional interactions with GAGA factor. *Genes Dev.* **17**, 1605-1616.
- Tagami, H., Ray-Gallet, D., Almouzni, G. and Nakatani, Y. (2004). Histone H3.1 and H3.3 complexes mediate nucleosome assembly pathways dependent or independent of DNA synthesis. *Cell* **116**, 51-61.
- Workman, J. L. (2006). Nucleosome displacement in transcription. *Genes Dev.* **20**, 2009-2017.
- Xiao, H., Sandaltzopoulos, R., Wang, H. M., Hamiche, A., Ranallo, R., Lee, K. M., Fu, D. and Wu, C. (2001). Dual functions of largest NURF subunit NURF301 in nucleosome sliding and transcription factor interactions. *Mol. Cell* **8**, 531-543.
